# Supplementary material for: Surfactant-assisted one-pot synthesis of superparamagnetic magnetite nanoparticle clusters with tunable cluster size and magnetic field sensitivity
Source: Royal Society of Chemistry journal article supplement (doi:10.1039/c0dt01280g), 2010-12-16
Supplement: c0dt01280g.pdf [file c0dt01280g.pdf]

## Supporting information

### **Surfactant-Assisted One-pot Synthesis of Superparamagnetic Magnetite Nanoparticle Clusters with a Tunable Cluster Size and Sensitivity for Magnetic Field**

*Takanari Togashi,<sup>\*a</sup> Takashi Naka,<sup>b</sup> Shunsuke Asahina,<sup>c,d</sup> Koichi Sato,<sup>c</sup> Seiichi Takami<sup>d</sup> and Tadafumi Adschiri,<sup>\*a</sup>*

a, Advanced Institute for Material Research Tohoku University, 2-1-1, Katahira, Aoba-ku, Sendai 980-8577, Japan

b, National Institute for Material Science, Sengen 1-2-1, Tsukuba, Ibaraki, 305-0047, Japan

c, JEOL (EUROPE) SAS, Escape Claude Monet-1 All'ée de Civerney, 78290 France

d, Institute of Multidisciplinary Research for Advanced Materials, Tohoku University, 2-1-1, Katahira, Aoba-ku, Sendai 980-8577, Japan

### ***Characterization of $\text{Fe}_3\text{O}_4$ nanoparticle cluster with FTIR method.***

The XRD pattern of the maghemite ( $\gamma\text{-Fe}_2\text{O}_3$ ) and magnetite ( $\text{Fe}_3\text{O}_4$ ) are very close. Therefore, to obtain additional data for characterization of spinel type iron oxide, the sample was measured by FT-IR spectrum.

Figure S1 show the FT-IR spectra of  $\gamma\text{-Fe}_2\text{O}_3$  (Nanostructured & Amorphous Materials, Inc. US),  $\text{Fe}_3\text{O}_4$  (Kanto Chemical Co., Inc, Japan), these are used as references, and synthesized iron oxide nanoparticle cluster with a diameter of 200 nm. The IR spectrum of the  $\gamma\text{-Fe}_2\text{O}_3$  the broad bands at 698, 638, 580, and 562  $\text{cm}^{-1}$  can be seen (Fig. S1 (a)). These are assigned as Fe-O bond of  $\gamma\text{-Fe}_2\text{O}_3$ .<sup>[1]</sup> In the FT-TIR spectrum of  $\text{Fe}_3\text{O}_4$ , one broad peak at 578  $\text{cm}^{-1}$  can be seen and this band is assigned as Fe-O band of  $\text{Fe}_3\text{O}_4$  (Fig. S1 (b)).<sup>[1]</sup> The IR-spectrum of the sample with a diameter of 200 nm also has broad peak at 578  $\text{cm}^{-1}$  and no additional peaks (Fig. S1 (c)). This result strongly supposed to assignment of the synthesized iron oxide nanoparticle cluster as  $\text{Fe}_3\text{O}_4$ .

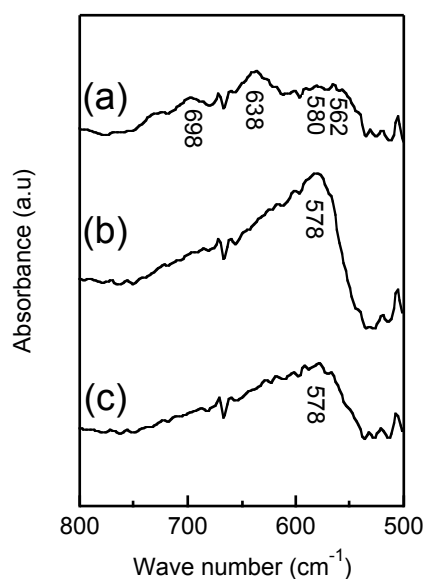

**Figure S1.** FT-IR spectrum of (a)  $\gamma\text{-Fe}_2\text{O}_3$ , (b)  $\text{Fe}_3\text{O}_4$ , and (c) synthesized  $\text{Fe}_3\text{O}_4$  nanoparticle cluster with a diameter of 200 nm

### **Reference**

[1] R.M. Cornell, U. Schwertmann, in *Iron Oxides* 2nd ed. 2003, pp 146.

### High resolution TEM image of the Fe<sub>3</sub>O<sub>4</sub> nanoparticle cluster

To confirm that the products were composed of tiny nanoparticle, the products were observed by HRTEM (Figure 2S). Figure 2S (a) and (b) were bright field image and dark field image of the products with a reaction time of 30 min. In dark field image, tiny bright spots were observed in bigger particle (Figure 2S (a), (b)). This indicates that the products were not single crystal and but consist of tiny Fe<sub>3</sub>O<sub>4</sub> particle. Figure 2S (c) is a high-resolution image of the products. Clear lattice fringe can be seen in HRTEM image, this indicates the products have good crystallinity and were not amorphous. Measured distance between two adjacent planes in a specific direction gives a value of about 0.3 nm, which corresponds to the lattice spacing of 111 planes (0.487 nm) and 022 planes (0.297 nm), respectively, of magnetite.

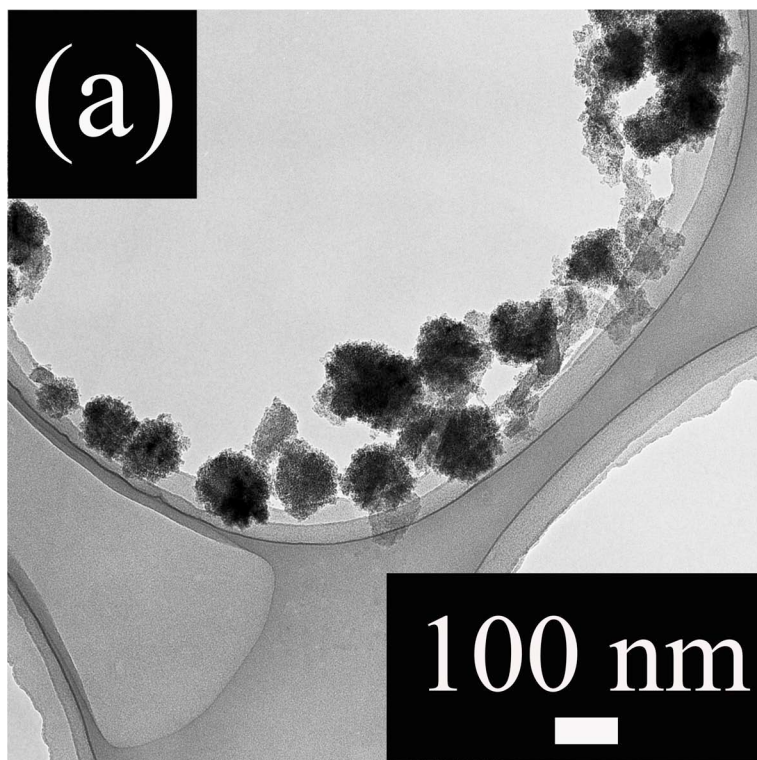

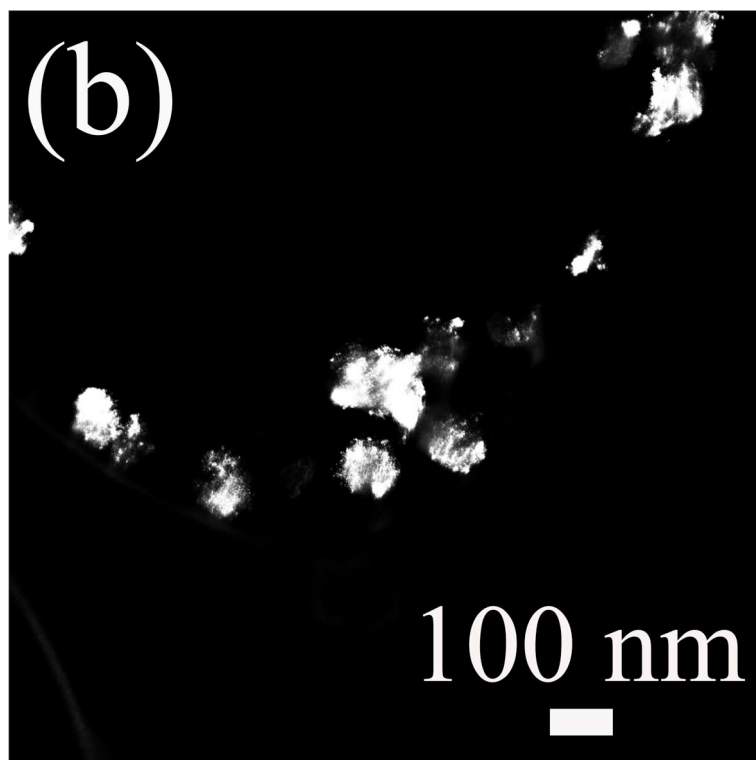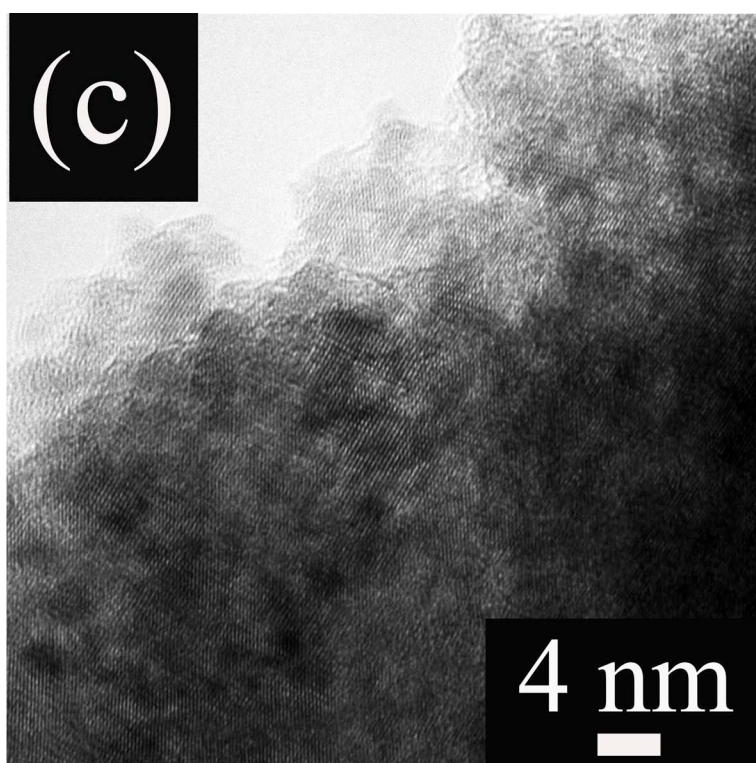

**Figure 2S.** TEM image of the products with a reaction time of a 30 min: (a) bright-field image, (b) dark-field image, and (c) high-resolution TEM image.
